# Supplementary material for: G2PDeep-v2: a web-based deep-learning framework for phenotype prediction and biomarker discovery for all organisms using multi-omics data
Source: Research Square preprint supplement (doi:10.21203/rs.3.rs-5776937/v1), 2025-01-09
Supplement: Supplementary file 3 [file 7d6301244a3808b9a676fa83.docx]

Supplementary information for

G2PDeep-v2: a web-based deep-learning framework for phenotype prediction and biomarker discovery using multi-omics data

Shuai Zeng1,2, Trinath Adusumilli1, Sania Zafar Awan3, Manish Sridhar Immadi1, Dong Xu1,2,3 and Trupti Joshi1,2,3,4,*

1 Department of Electrical Engineering and Computer Science, University of Missouri, Columbia, MO, 65211, USA

2 Christopher S. Bond Life Sciences Center, University of Missouri, Columbia, MO, 65211, USA

3 MU Institute for Data Science and Informatics, University of Missouri-Columbia, Columbia, MO, 65211, USA

4 Department of Biomedical Informatics, Biostatistics and Medical Epidemiology, University of Missouri, Columbia, MO, 65211, USA

* To whom correspondence should be addressed. Tel: +1 (573) 884-5963; Email: joshitr@health.missouri.edu

Email:

Shuai Zeng, zengs@missouri.edu

Trinath Adusumilli, tafbr@missouri.edu

Sania Zafar Awan, sah2p@missouri.edu

Manish Sridhar Immadi, mizy9@missouri.edu

Dong Xu, xudong@missouri.edu

Trupti Joshi, joshitr@health.missouri.edu


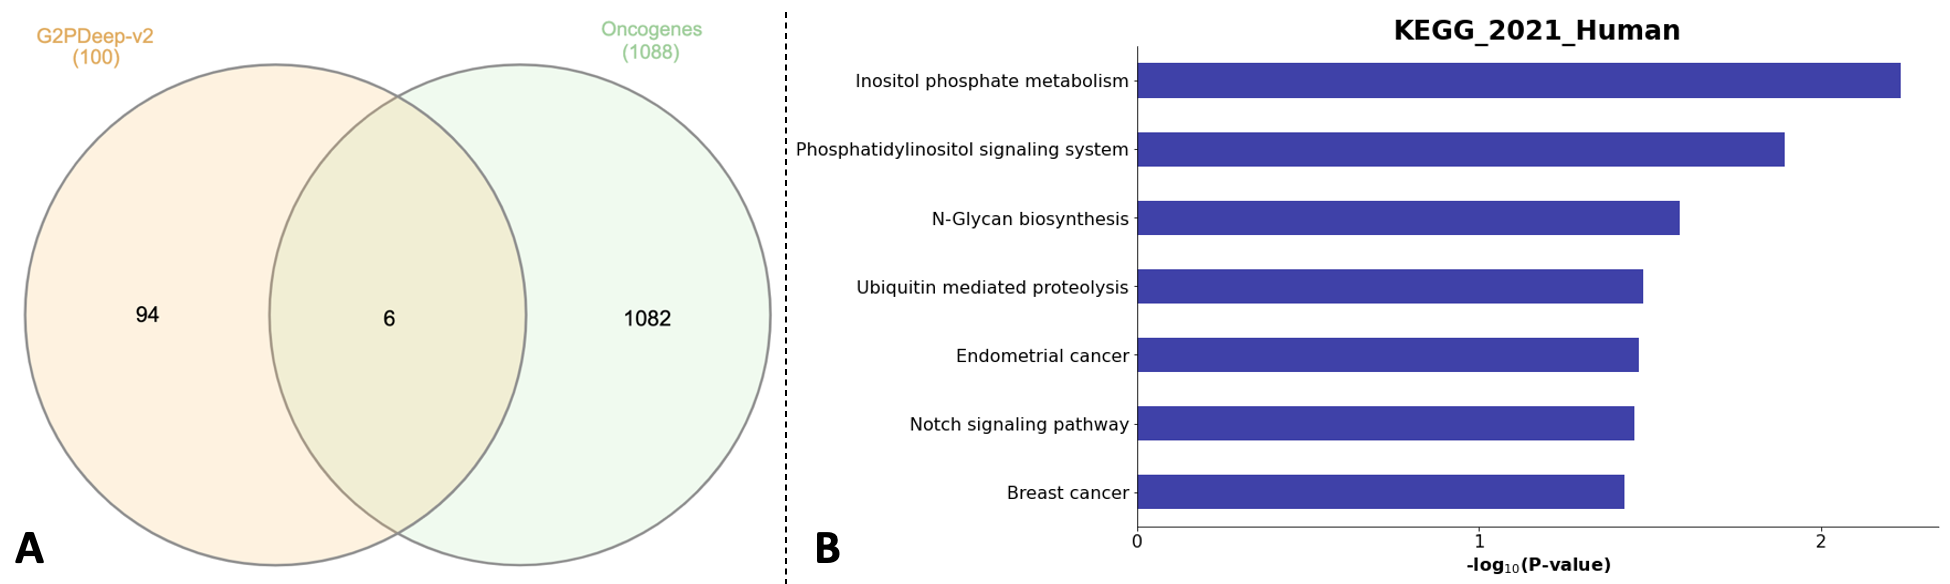


**Supplementary Fig. 1**. Plots for significant biomarkers. (A) Venn diagram of 100 most significant biomarkers and oncogenes. (B) Enriched seven pathways associated with breast cancer.
