# Supplementary material for: G2PDeep-v2: a web-based deep-learning framework for phenotype prediction and biomarker discovery for all organisms using multi-omics data
Source: Research Square preprint supplement (doi:10.21203/rs.3.rs-5776937/v1), 2025-01-09
Supplement: Supplementary file 6 [file a764cc1d02ab7a36429c732e.xlsx]

## Sheet: ACC
study	combination of multi-omics	our proposed multi-CNN	Decision Tree (DT)	Logistic Regression (LR)	Random Forest (RF)	Support Vector Machine (SVM)
ACC	CNV	0.789	0.707	0.734	0.814	0.767
	Methylation	0.841	0.651	0.89	0.83	0.851
	Protein	0.838	0.75	0.855	0.848	0.828
	RNAseq	0.778	0.769	0.813	0.827	0.81
	SNP	0.705	0.712	0.756	0.777	0.737
	miRNA	0.773	0.683	0.671	0.77	0.751
	CNV | Methylation	0.845	0.623	0.853	0.782	0.789
	CNV | Protein	0.8	0.657	0.853	0.808	0.853
	CNV | SNP	0.715	0.705	0.672	0.814	0.768
	CNV | miRNA	0.709	0.608	0.853	0.859	0.852
	Protein | Methylation	0.922	0.693	0.906	0.885	0.824
	Protein | SNP	0.902	0.721	0.89	0.892	0.818
	RNAseq | CNV	0.817	0.717	0.842	0.885	0.781
	RNAseq | Methylation	0.794	0.694	0.882	0.857	0.887
	RNAseq | Protein	0.805	0.75	0.842	0.934	0.857
	RNAseq | SNP	0.79	0.728	0.853	0.89	0.815
	RNAseq | miRNA	0.714	0.726	0.862	0.864	0.794
	SNP | Methylation	0.854	0.824	0.882	0.842	0.883
	miRNA | Methylation	0.804	0.685	0.865	0.832	0.833
	miRNA | Protein	0.84	0.607	0.729	0.883	0.787
	miRNA | SNP	0.822	0.715	0.757	0.763	0.771
	CNV | Protein | Methylation	0.886	0.6	0.841	0.841	0.833
	CNV | Protein | SNP	0.82	0.714	0.849	0.869	0.788
	CNV | SNP | Methylation	0.805	0.64	0.826	0.831	0.848
	CNV | miRNA | Methylation	0.823	0.688	0.874	0.862	0.841
	CNV | miRNA | Protein	0.837	0.743	0.767	0.833	0.763
	CNV | miRNA | SNP	0.793	0.701	0.804	0.817	0.853
	Protein | SNP | Methylation	0.852	0.7	0.92	0.84	0.889
	RNAseq | CNV | Methylation	0.815	0.717	0.9	0.842	0.875
	RNAseq | CNV | Protein	0.796	0.657	0.824	0.9	0.861
	RNAseq | CNV | SNP	0.849	0.783	0.824	0.877	0.806
	RNAseq | CNV | miRNA	0.829	0.733	0.804	0.892	0.84
	RNAseq | Protein | Methylation	0.856	0.696	0.861	0.861	0.854
	RNAseq | Protein | SNP	0.826	0.639	0.857	0.932	0.881
	RNAseq | SNP | Methylation	0.761	0.699	0.861	0.836	0.852
	RNAseq | miRNA | Methylation	0.81	0.673	0.885	0.854	0.886
	RNAseq | miRNA | Protein	0.809	0.864	0.907	0.956	0.8
	RNAseq | miRNA | SNP	0.782	0.756	0.886	0.885	0.829
	miRNA | Protein | Methylation	0.898	0.693	0.912	0.867	0.826
	miRNA | Protein | SNP	0.784	0.696	0.742	0.817	0.752
	miRNA | SNP | Methylation	0.763	0.653	0.832	0.826	0.82
Note
The BOLD value denotes the best performance within a specific combination of multi-omics data.

## Sheet: BLCA
study	combination of multi-omics	our proposed multi-CNN	Decision Tree (DT)	Logistic Regression (LR)	Random Forest (RF)	Support Vector Machine (SVM)
BLCA	CNV	0.665	0.568	0.596	0.609	0.657
	Methylation	0.697	0.56	0.73	0.711	0.702
	Protein	0.679	0.553	0.655	0.682	0.668
	RNAseq	0.675	0.561	0.651	0.678	0.649
	SNP	0.709	0.615	0.718	0.719	0.725
	miRNA	0.702	0.572	0.647	0.688	0.669
	CNV | Methylation	0.679	0.572	0.655	0.695	0.652
	CNV | Protein	0.655	0.62	0.607	0.634	0.629
	CNV | SNP	0.655	0.584	0.577	0.663	0.659
	CNV | miRNA	0.646	0.561	0.541	0.647	0.605
	Protein | Methylation	0.676	0.558	0.648	0.659	0.66
	Protein | SNP	0.702	0.53	0.683	0.698	0.714
	RNAseq | CNV	0.667	0.618	0.626	0.676	0.644
	RNAseq | Methylation	0.682	0.56	0.667	0.709	0.693
	RNAseq | Protein	0.647	0.602	0.678	0.668	0.689
	RNAseq | SNP	0.696	0.548	0.631	0.656	0.642
	RNAseq | miRNA	0.64	0.544	0.656	0.638	0.677
	SNP | Methylation	0.673	0.56	0.718	0.68	0.705
	miRNA | Methylation	0.719	0.592	0.74	0.682	0.733
	miRNA | Protein	0.678	0.522	0.656	0.651	0.693
	miRNA | SNP	0.715	0.596	0.679	0.717	0.75
	CNV | Protein | Methylation	0.663	0.541	0.657	0.684	0.672
	CNV | Protein | SNP	0.699	0.577	0.622	0.667	0.656
	CNV | SNP | Methylation	0.665	0.528	0.611	0.682	0.636
	CNV | miRNA | Methylation	0.67	0.621	0.648	0.685	0.66
	CNV | miRNA | Protein	0.643	0.583	0.594	0.687	0.6
	CNV | miRNA | SNP	0.684	0.641	0.574	0.678	0.635
	Protein | SNP | Methylation	0.641	0.577	0.702	0.701	0.716
	RNAseq | CNV | Methylation	0.655	0.593	0.617	0.691	0.669
	RNAseq | CNV | Protein	0.657	0.522	0.635	0.639	0.675
	RNAseq | CNV | SNP	0.691	0.529	0.642	0.662	0.683
	RNAseq | CNV | miRNA	0.683	0.557	0.662	0.672	0.708
	RNAseq | Protein | Methylation	0.659	0.579	0.661	0.688	0.676
	RNAseq | Protein | SNP	0.676	0.55	0.633	0.674	0.673
	RNAseq | SNP | Methylation	0.67	0.56	0.685	0.724	0.692
	RNAseq | miRNA | Methylation	0.657	0.552	0.709	0.679	0.72
	RNAseq | miRNA | Protein	0.654	0.656	0.617	0.679	0.65
	RNAseq | miRNA | SNP	0.694	0.504	0.67	0.676	0.702
	miRNA | Protein | Methylation	0.655	0.582	0.688	0.706	0.717
	miRNA | Protein | SNP	0.708	0.54	0.678	0.675	0.724
	miRNA | SNP | Methylation	0.67	0.608	0.719	0.679	0.735
Note
The BOLD value denotes the best performance within a specific combination of multi-omics data.

## Sheet: BRCA
study	combination of multi-omics	our proposed multi-CNN	Decision Tree (DT)	Logistic Regression (LR)	Random Forest (RF)	Support Vector Machine (SVM)
BRCA	CNV	0.889	0.77	0.831	0.893	0.895
	Methylation	0.9	0.742	0.901	0.889	0.915
	Protein	0.887	0.717	0.871	0.881	0.893
	RNAseq	0.884	0.771	0.874	0.879	0.885
	SNP	0.898	0.844	0.876	0.883	0.892
	miRNA	0.888	0.744	0.878	0.882	0.868
	CNV | Methylation	0.888	0.76	0.872	0.895	0.882
	CNV | Protein	0.882	0.768	0.812	0.873	0.876
	CNV | SNP	0.887	0.81	0.847	0.88	0.861
	CNV | miRNA	0.88	0.771	0.825	0.875	0.871
	Protein | Methylation	0.887	0.777	0.893	0.897	0.9
	Protein | SNP	0.888	0.781	0.883	0.883	0.88
	RNAseq | CNV	0.887	0.784	0.848	0.885	0.89
	RNAseq | Methylation	0.894	0.747	0.897	0.891	0.906
	RNAseq | Protein	0.863	0.773	0.862	0.88	0.884
	RNAseq | SNP	0.894	0.8	0.889	0.885	0.894
	RNAseq | miRNA	0.883	0.753	0.853	0.893	0.858
	SNP | Methylation	0.896	0.745	0.913	0.897	0.906
	miRNA | Methylation	0.868	0.744	0.897	0.881	0.908
	miRNA | Protein	0.879	0.726	0.859	0.873	0.873
	miRNA | SNP	0.903	0.825	0.869	0.886	0.897
	CNV | Protein | Methylation	0.904	0.77	0.871	0.9	0.879
	CNV | Protein | SNP	0.879	0.805	0.819	0.883	0.881
	CNV | SNP | Methylation	0.886	0.745	0.862	0.897	0.88
	CNV | miRNA | Methylation	0.867	0.783	0.854	0.888	0.868
	CNV | miRNA | Protein	0.87	0.691	0.846	0.864	0.863
	CNV | miRNA | SNP	0.888	0.821	0.849	0.884	0.88
	Protein | SNP | Methylation	0.901	0.736	0.902	0.902	0.907
	RNAseq | CNV | Methylation	0.883	0.746	0.881	0.882	0.899
	RNAseq | CNV | Protein	0.88	0.778	0.835	0.879	0.87
	RNAseq | CNV | SNP	0.891	0.814	0.831	0.882	0.88
	RNAseq | CNV | miRNA	0.878	0.763	0.832	0.876	0.877
	RNAseq | Protein | Methylation	0.893	0.743	0.9	0.895	0.904
	RNAseq | Protein | SNP	0.895	0.788	0.888	0.882	0.878
	RNAseq | SNP | Methylation	0.887	0.727	0.885	0.89	0.904
	RNAseq | miRNA | Methylation	0.867	0.789	0.876	0.888	0.9
	RNAseq | miRNA | Protein	0.884	0.747	0.857	0.882	0.876
	RNAseq | miRNA | SNP	0.907	0.819	0.885	0.899	0.898
	miRNA | Protein | Methylation	0.888	0.744	0.901	0.901	0.913
	miRNA | Protein | SNP	0.906	0.79	0.881	0.895	0.895
	miRNA | SNP | Methylation	0.891	0.759	0.899	0.896	0.908
Note
The BOLD value denotes the best performance within a specific combination of multi-omics data.

## Sheet: CESC
study	combination of multi-omics	our proposed multi-CNN	Decision Tree (DT)	Logistic Regression (LR)	Random Forest (RF)	Support Vector Machine (SVM)
CESC	CNV	0.665	0.454	0.531	0.605	0.645
	Methylation	0.702	0.59	0.696	0.688	0.709
	Protein	0.722	0.646	0.618	0.685	0.675
	RNAseq	0.67	0.589	0.662	0.661	0.704
	SNP	0.641	0.559	0.667	0.569	0.642
	miRNA	0.673	0.576	0.669	0.625	0.658
	CNV | Methylation	0.72	0.538	0.539	0.734	0.617
	CNV | Protein	0.713	0.595	0.647	0.728	0.709
	CNV | SNP	0.665	0.519	0.425	0.528	0.67
	CNV | miRNA	0.66	0.517	0.521	0.51	0.662
	Protein | Methylation	0.679	0.508	0.678	0.69	0.686
	Protein | SNP	0.66	0.506	0.703	0.734	0.744
	RNAseq | CNV	0.678	0.562	0.594	0.731	0.659
	RNAseq | Methylation	0.714	0.582	0.684	0.72	0.651
	RNAseq | Protein	0.665	0.569	0.676	0.695	0.641
	RNAseq | SNP	0.656	0.551	0.71	0.639	0.67
	RNAseq | miRNA	0.673	0.561	0.717	0.693	0.66
	SNP | Methylation	0.708	0.644	0.707	0.681	0.727
	miRNA | Methylation	0.668	0.547	0.653	0.67	0.702
	miRNA | Protein	0.701	0.585	0.518	0.725	0.65
	miRNA | SNP	0.634	0.631	0.69	0.574	0.587
	CNV | Protein | Methylation	0.723	0.68	0.665	0.745	0.682
	CNV | Protein | SNP	0.722	0.626	0.623	0.63	0.72
	CNV | SNP | Methylation	0.696	0.668	0.601	0.716	0.624
	CNV | miRNA | Methylation	0.702	0.618	0.576	0.714	0.635
	CNV | miRNA | Protein	0.757	0.627	0.641	0.718	0.748
	CNV | miRNA | SNP	0.645	0.526	0.628	0.609	0.611
	Protein | SNP | Methylation	0.665	0.56	0.654	0.64	0.719
	RNAseq | CNV | Methylation	0.697	0.511	0.679	0.742	0.625
	RNAseq | CNV | Protein	0.746	0.642	0.682	0.713	0.727
	RNAseq | CNV | SNP	0.678	0.572	0.637	0.678	0.652
	RNAseq | CNV | miRNA	0.685	0.54	0.61	0.673	0.603
	RNAseq | Protein | Methylation	0.741	0.554	0.743	0.709	0.675
	RNAseq | Protein | SNP	0.681	0.574	0.703	0.659	0.68
	RNAseq | SNP | Methylation	0.686	0.55	0.684	0.736	0.693
	RNAseq | miRNA | Methylation	0.667	0.575	0.664	0.708	0.675
	RNAseq | miRNA | Protein	0.675	0.508	0.718	0.695	0.678
	RNAseq | miRNA | SNP	0.653	0.585	0.704	0.668	0.683
	miRNA | Protein | Methylation	0.682	0.554	0.666	0.64	0.703
	miRNA | Protein | SNP	0.688	0.64	0.681	0.653	0.754
	miRNA | SNP | Methylation	0.675	0.573	0.69	0.715	0.702
Note
The BOLD value denotes the best performance within a specific combination of multi-omics data.

## Sheet: CHOL
study	combination of multi-omics	our proposed multi-CNN	Decision Tree (DT)	Logistic Regression (LR)	Random Forest (RF)	Support Vector Machine (SVM)
CHOL	CNV	0.626	0.307	0.595	0.399	0.448
	Methylation	0.581	0.42	0.375	0.477	0.485
	Protein	0.612	0.52	0.404	0.616	0.49
	RNAseq	0.59	0.46	0.31	0.443	0.705
	SNP	0.731	0.533	0.488	0.522	0.493
	miRNA	0.677	0.453	0.445	0.672	0.437
	CNV | Methylation	0.562	0.493	0.48	0.468	0.513
	CNV | Protein	0.654	0.31	0.428	0.34	0.642
	CNV | SNP	0.682	0.387	0.465	0.511	0.559
	CNV | miRNA	0.712	0.387	0.563	0.595	0.444
	Protein | Methylation	0.604	0.27	0.196	0.243	0.633
	Protein | SNP	0.55	0.42	0.352	0.582	0.467
	RNAseq | CNV	0.594	0.547	0.481	0.526	0.545
	RNAseq | Methylation	0.512	0.573	0.294	0.347	0.606
	RNAseq | Protein	0.637	0.44	0.204	0.366	0.807
	RNAseq | SNP	0.581	0.613	0.504	0.544	0.591
	RNAseq | miRNA	0.444	0.387	0.334	0.381	0.672
	SNP | Methylation	0.605	0.393	0.329	0.514	0.499
	miRNA | Methylation	0.554	0.42	0.394	0.404	0.458
	miRNA | Protein	0.592	0.46	0.242	0.654	0.641
	miRNA | SNP	0.576	0.653	0.672	0.798	0.346
	CNV | Protein | Methylation	0.578	0.59	0.462	0.442	0.597
	CNV | Protein | SNP	0.78	0.32	0.266	0.257	0.645
	CNV | SNP | Methylation	0.61	0.38	0.395	0.395	0.55
	CNV | miRNA | Methylation	0.616	0.58	0.506	0.554	0.461
	CNV | miRNA | Protein	0.685	0.5	0.511	0.523	0.716
	CNV | miRNA | SNP	0.723	0.527	0.483	0.559	0.469
	Protein | SNP | Methylation	0.6	0.64	0.5	0.456	0.464
	RNAseq | CNV | Methylation	0.709	0.58	0.451	0.335	0.59
	RNAseq | CNV | Protein	0.552	0.62	0.292	0.389	0.738
	RNAseq | CNV | SNP	0.622	0.54	0.336	0.341	0.623
	RNAseq | CNV | miRNA	0.666	0.46	0.32	0.569	0.603
	RNAseq | Protein | Methylation	0.415	0.53	0.154	0.523	0.747
	RNAseq | Protein | SNP	0.354	0.36	0.177	0.395	0.801
	RNAseq | SNP | Methylation	0.546	0.473	0.38	0.547	0.562
	RNAseq | miRNA | Methylation	0.656	0.607	0.248	0.519	0.587
	RNAseq | miRNA | Protein	0.43	0.36	0.311	0.3	0.762
	RNAseq | miRNA | SNP	0.437	0.347	0.247	0.459	0.705
	miRNA | Protein | Methylation	0.549	0.54	0.356	0.574	0.657
	miRNA | Protein | SNP	0.382	0.36	0.25	0.522	0.526
	miRNA | SNP | Methylation	0.552	0.507	0.511	0.597	0.4
Note
The BOLD value denotes the best performance within a specific combination of multi-omics data.

## Sheet: COAD
study	combination of multi-omics	our proposed multi-CNN	Decision Tree (DT)	Logistic Regression (LR)	Random Forest (RF)	Support Vector Machine (SVM)
COAD	CNV	0.612	0.649	0.524	0.525	0.591
	Methylation	0.643	0.485	0.554	0.597	0.617
	Protein	0.62	0.465	0.603	0.566	0.579
	RNAseq	0.651	0.492	0.634	0.539	0.625
	SNP	0.611	0.569	0.604	0.597	0.586
	miRNA	0.671	0.429	0.508	0.572	0.638
	CNV | Methylation	0.653	0.512	0.579	0.576	0.634
	CNV | Protein	0.647	0.607	0.609	0.679	0.579
	CNV | SNP	0.626	0.588	0.567	0.592	0.544
	CNV | miRNA	0.675	0.559	0.565	0.63	0.663
	Protein | Methylation	0.677	0.563	0.572	0.685	0.662
	Protein | SNP	0.608	0.542	0.62	0.607	0.584
	RNAseq | CNV	0.646	0.493	0.577	0.603	0.628
	RNAseq | Methylation	0.624	0.525	0.579	0.544	0.596
	RNAseq | Protein	0.622	0.494	0.51	0.551	0.634
	RNAseq | SNP	0.64	0.523	0.634	0.632	0.62
	RNAseq | miRNA	0.64	0.494	0.56	0.554	0.605
	SNP | Methylation	0.643	0.531	0.599	0.578	0.625
	miRNA | Methylation	0.609	0.527	0.526	0.596	0.588
	miRNA | Protein	0.685	0.476	0.591	0.597	0.604
	miRNA | SNP	0.615	0.549	0.639	0.639	0.652
	CNV | Protein | Methylation	0.609	0.539	0.525	0.612	0.58
	CNV | Protein | SNP	0.645	0.572	0.581	0.621	0.597
	CNV | SNP | Methylation	0.611	0.519	0.57	0.576	0.58
	CNV | miRNA | Methylation	0.688	0.505	0.631	0.638	0.679
	CNV | miRNA | Protein	0.629	0.579	0.608	0.585	0.625
	CNV | miRNA | SNP	0.67	0.604	0.592	0.676	0.693
	Protein | SNP | Methylation	0.652	0.539	0.596	0.663	0.668
	RNAseq | CNV | Methylation	0.605	0.529	0.544	0.575	0.615
	RNAseq | CNV | Protein	0.666	0.455	0.612	0.596	0.644
	RNAseq | CNV | SNP	0.652	0.557	0.605	0.617	0.676
	RNAseq | CNV | miRNA	0.644	0.485	0.604	0.559	0.656
	RNAseq | Protein | Methylation	0.631	0.474	0.533	0.627	0.644
	RNAseq | Protein | SNP	0.61	0.4	0.511	0.528	0.67
	RNAseq | SNP | Methylation	0.615	0.558	0.522	0.537	0.626
	RNAseq | miRNA | Methylation	0.605	0.473	0.545	0.631	0.613
	RNAseq | miRNA | Protein	0.622	0.535	0.478	0.503	0.696
	RNAseq | miRNA | SNP	0.657	0.506	0.531	0.546	0.641
	miRNA | Protein | Methylation	0.592	0.658	0.574	0.624	0.628
	miRNA | Protein | SNP	0.632	0.508	0.642	0.627	0.584
	miRNA | SNP | Methylation	0.619	0.462	0.527	0.539	0.639
Note
The BOLD value denotes the best performance within a specific combination of multi-omics data.

## Sheet: ESCA
study	combination of multi-omics	our proposed multi-CNN	Decision Tree (DT)	Logistic Regression (LR)	Random Forest (RF)	Support Vector Machine (SVM)
ESCA	CNV	0.809	0.639	0.768	0.806	0.774
	Methylation	0.838	0.691	0.777	0.8	0.784
	Protein	0.824	0.607	0.76	0.796	0.791
	RNAseq	0.836	0.652	0.754	0.826	0.811
	SNP	0.816	0.791	0.831	0.774	0.821
	miRNA	0.845	0.69	0.733	0.818	0.783
	CNV | Methylation	0.818	0.709	0.754	0.815	0.791
	CNV | Protein	0.767	0.649	0.7	0.761	0.816
	CNV | SNP	0.805	0.686	0.744	0.802	0.776
	CNV | miRNA	0.807	0.675	0.76	0.81	0.825
	Protein | Methylation	0.791	0.665	0.698	0.765	0.827
	Protein | SNP	0.743	0.607	0.819	0.798	0.775
	RNAseq | CNV	0.803	0.671	0.799	0.805	0.796
	RNAseq | Methylation	0.838	0.684	0.744	0.858	0.818
	RNAseq | Protein	0.838	0.66	0.69	0.764	0.758
	RNAseq | SNP	0.819	0.682	0.727	0.773	0.803
	RNAseq | miRNA	0.826	0.686	0.765	0.803	0.82
	SNP | Methylation	0.816	0.744	0.804	0.846	0.807
	miRNA | Methylation	0.808	0.678	0.799	0.827	0.791
	miRNA | Protein	0.761	0.569	0.678	0.786	0.765
	miRNA | SNP	0.812	0.699	0.801	0.793	0.79
	CNV | Protein | Methylation	0.779	0.627	0.678	0.765	0.732
	CNV | Protein | SNP	0.787	0.673	0.73	0.777	0.774
	CNV | SNP | Methylation	0.815	0.685	0.791	0.832	0.797
	CNV | miRNA | Methylation	0.823	0.629	0.782	0.816	0.798
	CNV | miRNA | Protein	0.793	0.767	0.704	0.716	0.751
	CNV | miRNA | SNP	0.816	0.697	0.772	0.81	0.761
	Protein | SNP | Methylation	0.784	0.647	0.693	0.756	0.807
	RNAseq | CNV | Methylation	0.829	0.765	0.706	0.848	0.835
	RNAseq | CNV | Protein	0.81	0.66	0.776	0.726	0.778
	RNAseq | CNV | SNP	0.83	0.753	0.83	0.808	0.824
	RNAseq | CNV | miRNA	0.83	0.694	0.798	0.814	0.783
	RNAseq | Protein | Methylation	0.81	0.66	0.754	0.788	0.784
	RNAseq | Protein | SNP	0.818	0.66	0.796	0.74	0.804
	RNAseq | SNP | Methylation	0.837	0.706	0.711	0.825	0.819
	RNAseq | miRNA | Methylation	0.86	0.709	0.808	0.839	0.836
	RNAseq | miRNA | Protein	0.834	0.48	0.66	0.721	0.762
	RNAseq | miRNA | SNP	0.826	0.694	0.731	0.792	0.808
	miRNA | Protein | Methylation	0.782	0.727	0.669	0.808	0.829
	miRNA | Protein | SNP	0.75	0.662	0.816	0.803	0.797
	miRNA | SNP | Methylation	0.811	0.627	0.769	0.808	0.755
Note
The BOLD value denotes the best performance within a specific combination of multi-omics data.

## Sheet: HNSC
study	combination of multi-omics	our proposed multi-CNN	Decision Tree (DT)	Logistic Regression (LR)	Random Forest (RF)	Support Vector Machine (SVM)
HNSC	CNV	0.617	0.563	0.507	0.586	0.562
	Methylation	0.616	0.538	0.629	0.599	0.607
	Protein	0.65	0.53	0.555	0.653	0.657
	RNAseq	0.617	0.492	0.581	0.619	0.555
	SNP	0.592	0.547	0.579	0.584	0.551
	miRNA	0.589	0.49	0.587	0.56	0.575
	CNV | Methylation	0.611	0.523	0.523	0.595	0.549
	CNV | Protein	0.639	0.611	0.56	0.641	0.595
	CNV | SNP	0.612	0.551	0.539	0.596	0.575
	CNV | miRNA	0.561	0.551	0.482	0.553	0.59
	Protein | Methylation	0.629	0.522	0.644	0.624	0.641
	Protein | SNP	0.67	0.591	0.606	0.645	0.619
	RNAseq | CNV	0.613	0.52	0.566	0.613	0.59
	RNAseq | Methylation	0.625	0.532	0.619	0.617	0.637
	RNAseq | Protein	0.648	0.52	0.559	0.627	0.607
	RNAseq | SNP	0.629	0.542	0.584	0.65	0.64
	RNAseq | miRNA	0.598	0.551	0.59	0.631	0.588
	SNP | Methylation	0.611	0.522	0.621	0.63	0.616
	miRNA | Methylation	0.606	0.547	0.641	0.623	0.613
	miRNA | Protein	0.666	0.561	0.625	0.658	0.605
	miRNA | SNP	0.585	0.552	0.588	0.536	0.602
	CNV | Protein | Methylation	0.623	0.599	0.57	0.615	0.627
	CNV | Protein | SNP	0.655	0.53	0.535	0.587	0.634
	CNV | SNP | Methylation	0.619	0.58	0.482	0.608	0.557
	CNV | miRNA | Methylation	0.601	0.517	0.504	0.593	0.578
	CNV | miRNA | Protein	0.631	0.567	0.556	0.586	0.619
	CNV | miRNA | SNP	0.599	0.56	0.487	0.508	0.563
	Protein | SNP | Methylation	0.613	0.507	0.645	0.597	0.643
	RNAseq | CNV | Methylation	0.605	0.542	0.592	0.661	0.636
	RNAseq | CNV | Protein	0.663	0.511	0.64	0.618	0.608
	RNAseq | CNV | SNP	0.636	0.529	0.539	0.614	0.579
	RNAseq | CNV | miRNA	0.598	0.559	0.518	0.614	0.592
	RNAseq | Protein | Methylation	0.63	0.52	0.593	0.605	0.63
	RNAseq | Protein | SNP	0.658	0.55	0.551	0.684	0.614
	RNAseq | SNP | Methylation	0.632	0.557	0.654	0.598	0.613
	RNAseq | miRNA | Methylation	0.592	0.572	0.605	0.609	0.572
	RNAseq | miRNA | Protein	0.66	0.569	0.56	0.633	0.625
	RNAseq | miRNA | SNP	0.662	0.575	0.611	0.65	0.633
	miRNA | Protein | Methylation	0.623	0.463	0.564	0.59	0.608
	miRNA | Protein | SNP	0.657	0.537	0.578	0.606	0.648
	miRNA | SNP | Methylation	0.583	0.493	0.612	0.559	0.604
Note
The BOLD value denotes the best performance within a specific combination of multi-omics data.

## Sheet: KICH
study	combination of multi-omics	our proposed multi-CNN	Decision Tree (DT)	Logistic Regression (LR)	Random Forest (RF)	Support Vector Machine (SVM)
KICH	CNV	0.933	0.867	0.885	0.93	0.908
	Methylation	0.962	0.789	0.92	0.923	0.914
	Protein	0.937	0.807	0.897	0.919	0.915
	RNAseq	0.935	0.831	0.92	0.949	0.939
	SNP	0.958	0.867	0.892	0.89	0.716
	miRNA	0.95	0.813	0.861	0.916	0.905
	CNV | Methylation	0.916	0.831	0.915	0.966	0.895
	CNV | Protein	0.902	0.845	0.898	0.954	0.894
	CNV | SNP	0.907	0.924	0.884	0.974	0.905
	CNV | miRNA	0.907	0.793	0.899	0.929	0.952
	Protein | Methylation	0.935	0.785	0.918	0.941	0.853
	Protein | SNP	0.927	0.884	0.925	0.885	0.917
	RNAseq | CNV	0.914	0.853	0.93	0.949	0.931
	RNAseq | Methylation	0.914	0.775	0.938	0.939	0.92
	RNAseq | Protein	0.933	0.842	0.913	0.934	0.942
	RNAseq | SNP	0.94	0.865	0.933	0.923	0.944
	RNAseq | miRNA	0.927	0.796	0.908	0.938	0.926
	SNP | Methylation	0.95	0.789	0.914	0.92	0.909
	miRNA | Methylation	0.952	0.884	0.951	0.952	0.94
	miRNA | Protein	0.933	0.844	0.852	0.895	0.868
	miRNA | SNP	0.935	0.773	0.93	0.86	0.878
	CNV | Protein | Methylation	0.963	0.844	0.904	0.97	0.904
	CNV | Protein | SNP	0.878	0.884	0.862	0.911	0.928
	CNV | SNP | Methylation	0.875	0.849	0.894	0.948	0.938
	CNV | miRNA | Methylation	0.883	0.795	0.909	0.932	0.939
	CNV | miRNA | Protein	0.882	0.807	0.905	0.91	0.919
	CNV | miRNA | SNP	0.883	0.867	0.913	0.926	0.944
	Protein | SNP | Methylation	0.943	0.864	0.931	0.925	0.819
	RNAseq | CNV | Methylation	0.896	0.849	0.92	0.93	0.933
	RNAseq | CNV | Protein	0.914	0.864	0.928	0.936	0.908
	RNAseq | CNV | SNP	0.904	0.867	0.9	0.947	0.934
	RNAseq | CNV | miRNA	0.914	0.815	0.916	0.934	0.903
	RNAseq | Protein | Methylation	0.949	0.825	0.939	0.939	0.914
	RNAseq | Protein | SNP	0.943	0.844	0.953	0.939	0.959
	RNAseq | SNP | Methylation	0.899	0.849	0.937	0.903	0.89
	RNAseq | miRNA | Methylation	0.927	0.778	0.953	0.936	0.956
	RNAseq | miRNA | Protein	0.932	0.824	0.94	0.919	0.945
	RNAseq | miRNA | SNP	0.944	0.778	0.944	0.935	0.946
	miRNA | Protein | Methylation	0.95	0.845	0.91	0.929	0.879
	miRNA | Protein | SNP	0.914	0.805	0.9	0.909	0.924
	miRNA | SNP | Methylation	0.903	0.831	0.923	0.922	0.93
Note
The BOLD value denotes the best performance within a specific combination of multi-omics data.

## Sheet: KIRC
study	combination of multi-omics	our proposed multi-CNN	Decision Tree (DT)	Logistic Regression (LR)	Random Forest (RF)	Support Vector Machine (SVM)
KIRC	CNV	0.77	0.642	0.68	0.747	0.78
	RNAseq	0.802	0.649	0.739	0.81	0.786
	SNP	0.812	0.712	0.727	0.764	0.551
	miRNA	0.81	0.706	0.79	0.811	0.754
	CNV | Methylation	0.792	0.63	0.764	0.788	0.77
	CNV | Protein	0.768	0.683	0.65	0.738	0.773
	CNV | SNP	0.815	0.722	0.751	0.819	0.82
	CNV | miRNA	0.775	0.621	0.722	0.757	0.767
	Protein | Methylation	0.785	0.642	0.828	0.799	0.83
	Protein | SNP	0.803	0.73	0.817	0.828	0.811
	RNAseq | CNV	0.821	0.682	0.742	0.81	0.8
	RNAseq | Methylation	0.804	0.599	0.762	0.786	0.796
	RNAseq | Protein	0.795	0.63	0.753	0.792	0.797
	RNAseq | SNP	0.838	0.716	0.742	0.835	0.819
	RNAseq | miRNA	0.804	0.707	0.719	0.778	0.782
	SNP | Methylation	0.848	0.639	0.836	0.812	0.83
	miRNA | Methylation	0.794	0.583	0.802	0.781	0.802
	miRNA | Protein	0.786	0.648	0.768	0.795	0.821
	miRNA | SNP	0.763	0.694	0.801	0.763	0.823
	CNV | Protein | Methylation	0.797	0.622	0.762	0.782	0.77
	CNV | Protein | SNP	0.816	0.693	0.753	0.802	0.819
	CNV | SNP | Methylation	0.831	0.71	0.812	0.837	0.842
	CNV | miRNA | Methylation	0.803	0.639	0.775	0.769	0.816
	CNV | miRNA | Protein	0.789	0.698	0.729	0.779	0.788
	CNV | miRNA | SNP	0.811	0.632	0.771	0.755	0.792
	Protein | SNP | Methylation	0.808	0.688	0.847	0.835	0.858
	RNAseq | CNV | Methylation	0.765	0.61	0.75	0.79	0.768
	RNAseq | CNV | Protein	0.809	0.673	0.729	0.796	0.796
	RNAseq | CNV | SNP	0.828	0.725	0.799	0.831	0.838
	RNAseq | CNV | miRNA	0.793	0.661	0.747	0.783	0.782
	RNAseq | Protein | Methylation	0.787	0.616	0.718	0.778	0.763
	RNAseq | Protein | SNP	0.848	0.762	0.776	0.838	0.834
	RNAseq | SNP | Methylation	0.813	0.667	0.785	0.803	0.81
	RNAseq | miRNA | Methylation	0.777	0.55	0.746	0.785	0.759
	RNAseq | miRNA | Protein	0.813	0.679	0.749	0.8	0.806
	RNAseq | miRNA | SNP	0.811	0.654	0.73	0.814	0.785
	miRNA | Protein | Methylation	0.776	0.697	0.823	0.811	0.832
	miRNA | Protein | SNP	0.822	0.703	0.819	0.805	0.808
	miRNA | SNP | Methylation	0.8	0.603	0.811	0.809	0.838
Note
The BOLD value denotes the best performance within a specific combination of multi-omics data.

[truncated: 13 more sheets: KIRP, LIHC, LUAD, LUSC, MESO, PAAD, READ, SARC, SKCM, STAD, THCA, UCEC, UCS]
